# Supplementary material
Source: PubMed Central journal article supplement (PMC2980835)
Supplement: NIHMS244425-supplement-Supp_Table_S1.pdf [file NIHMS244425-supplement-Supp_Table_S1.pdf]

**Table S1. Effects of exogenous SMase C/SM pretreatment on cellular SM content.**

| cell pre-treatment regimen |                      | [SM] (nM) /<br>total protein (mg) <sup>3</sup> | P value <sup>4</sup> |
|----------------------------|----------------------|------------------------------------------------|----------------------|
| phase 1 <sup>1</sup>       | phase 2 <sup>2</sup> |                                                |                      |
| mock <sup>5</sup>          | mock                 | 78 (± 2) <sup>6</sup>                          | -                    |
| SMase C <sup>7</sup>       | mock                 | 43 (± 3)                                       | <0.005               |
| mock                       | SM <sup>8</sup>      | 110 (± 5)                                      | 0.04                 |
| SMase C                    | SM                   | 65 (± 6)                                       | 0.01                 |

<sup>1</sup> During phase 1, cells were incubated for 1 h at 37 °C in a humidified environment and under 5% CO<sub>2</sub>, followed by washing with complete cell medium that had been pre-chilled on ice.

<sup>2</sup> During phase 2, cells were incubated for 30 min on ice.

<sup>3</sup> SM was quantified as described under “Experimental Procedures.”

<sup>4</sup> P values were calculated as described under “Experimental Procedures.” Statistical significance was calculated for differences in SM content of those cells pretreated with SMase C and/or SM and those cells that were mock pre-treated.

<sup>5</sup> Mock refers to incubation with complete cell medium.

<sup>6</sup> Error expressed as standard deviations.

<sup>7</sup> (50 mU/mL)

<sup>8</sup> (50 μM)
