# Supplementary material
Source: PubMed Central journal article supplement (PMC2980835)

Figure S1. Gupta *et al.*, 2009

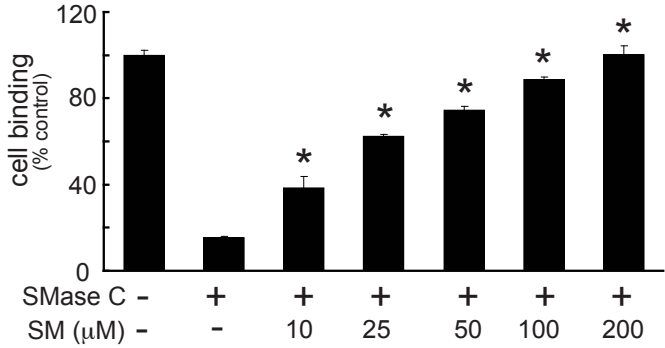

Supplement: NIHMS244425-supplement-Supp_Figure_S1.pdf [file NIHMS244425-supplement-Supp_Figure_S1.pdf]

Figure S2. Gupta *et al.*, 2009

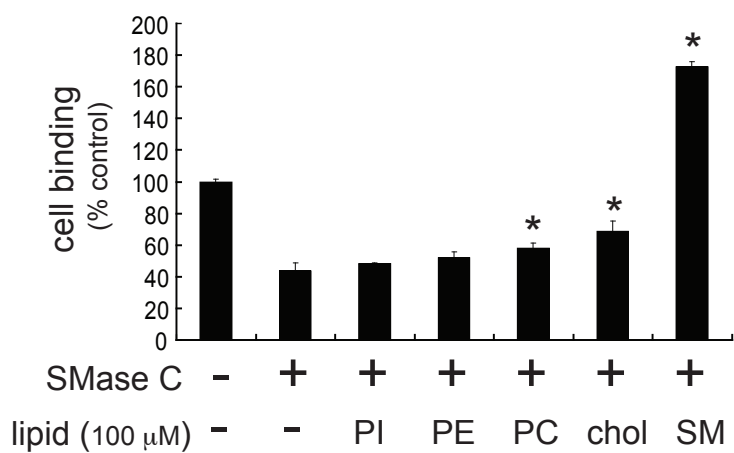

Supplement: NIHMS244425-supplement-Supp_Figure_S2.pdf [file NIHMS244425-supplement-Supp_Figure_S2.pdf]

Figure S3. Gupta *et al.*, 2009

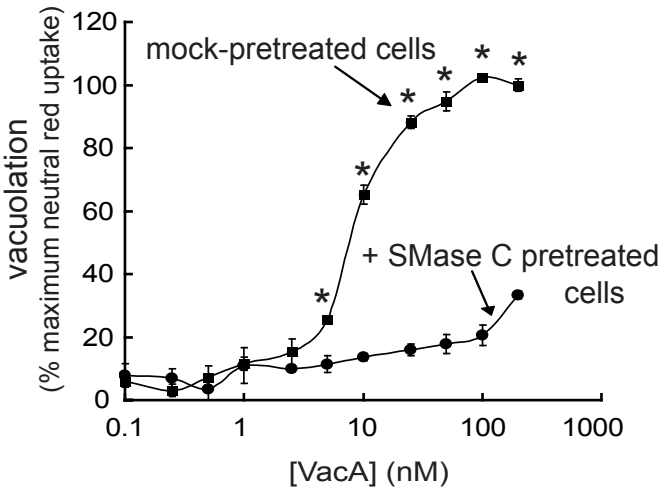

Supplement: NIHMS244425-supplement-Supp_Figure_S3.pdf [file NIHMS244425-supplement-Supp_Figure_S3.pdf]

Figure S4. Gupta *et al.*, 2009

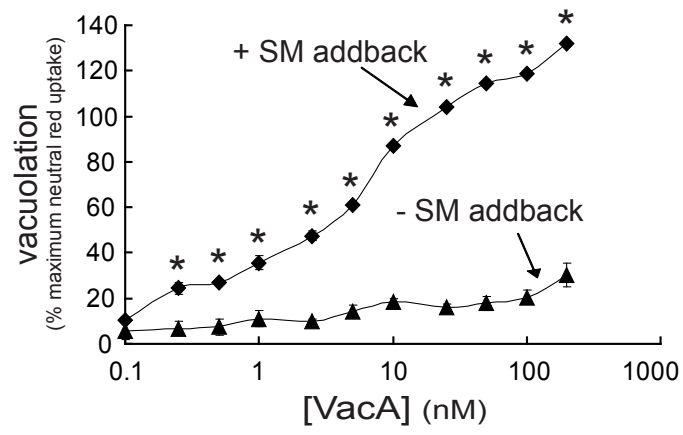

Supplement: NIHMS244425-supplement-Supp_Figure_S4.pdf [file NIHMS244425-supplement-Supp_Figure_S4.pdf]

Figure S5. Gupta *et al.*, 2009

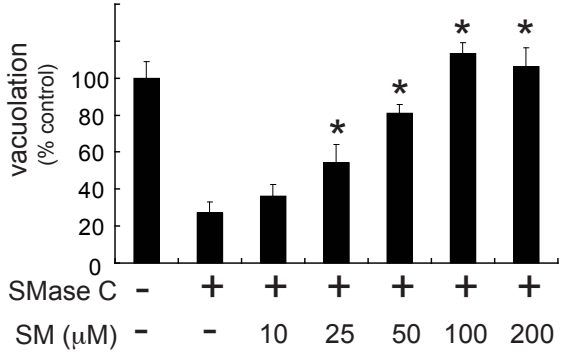

Supplement: NIHMS244425-supplement-Supp_Figure_S5.pdf [file NIHMS244425-supplement-Supp_Figure_S5.pdf]

Figure S6. Gupta *et al.*, 2009

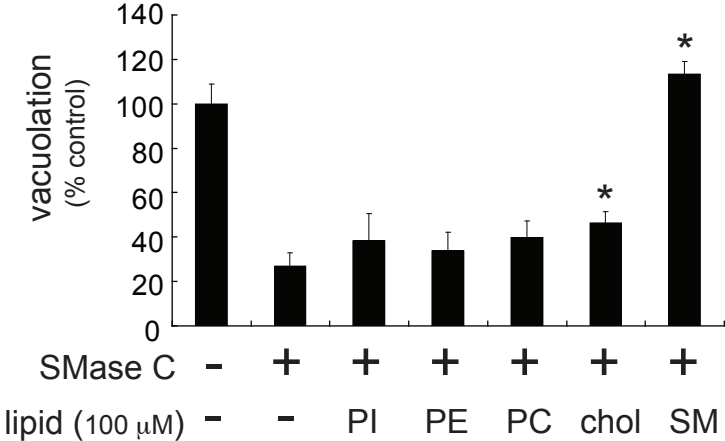

Supplement: NIHMS244425-supplement-Supp_Figure_S6.pdf [file NIHMS244425-supplement-Supp_Figure_S6.pdf]

Figure S7. Gupta *et al.*, 2009

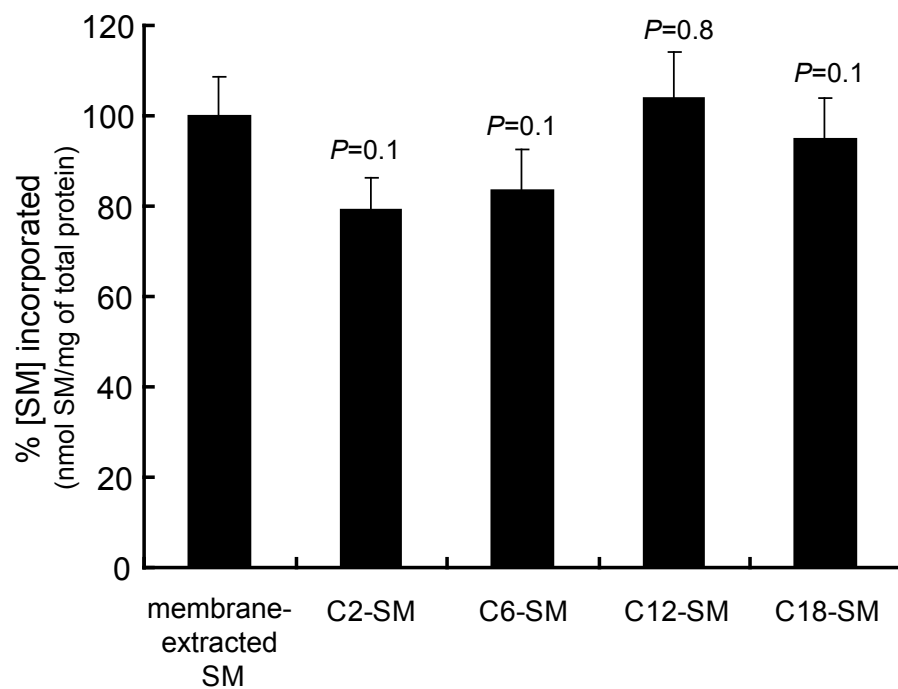

Supplement: NIHMS244425-supplement-Supp_Figure_S7.pdf [file NIHMS244425-supplement-Supp_Figure_S7.pdf]

Figure S8. Gupta *et al.*, 2009

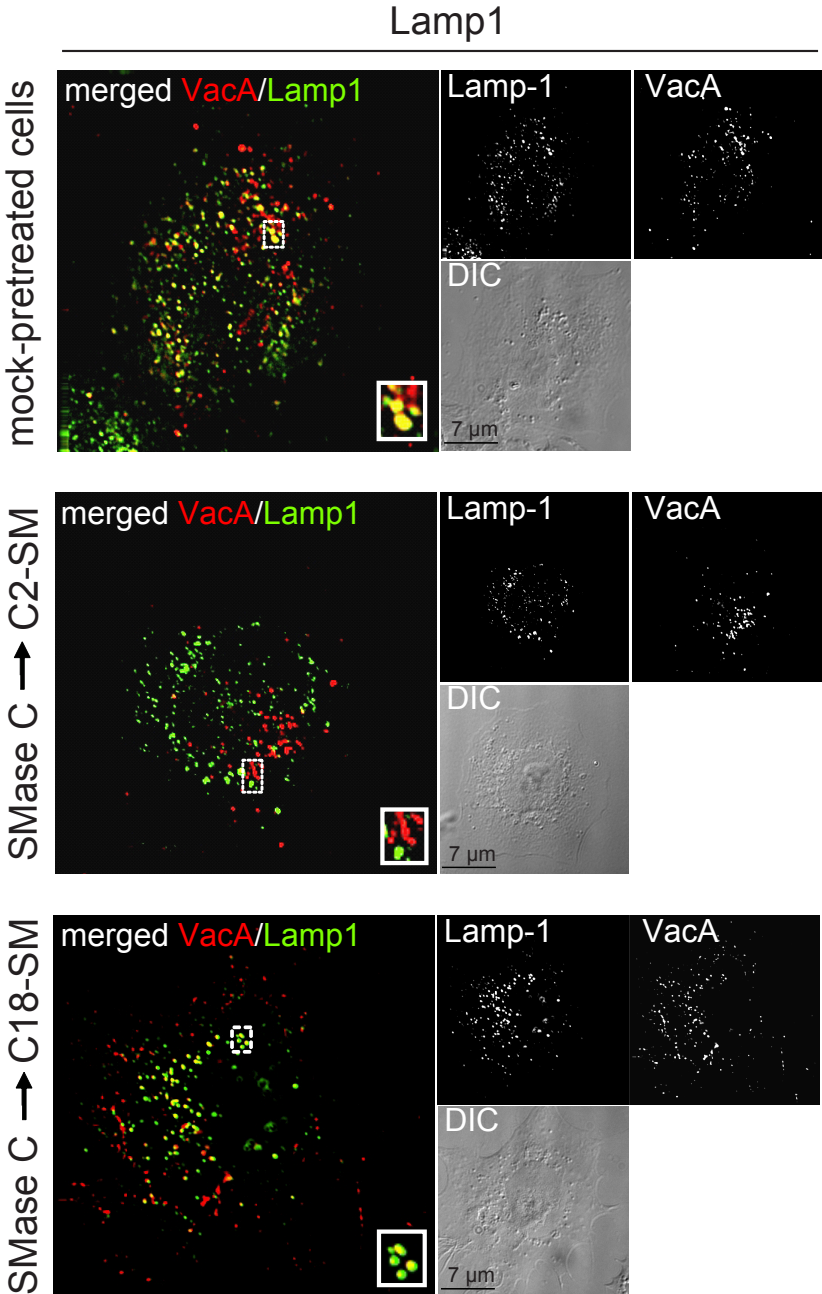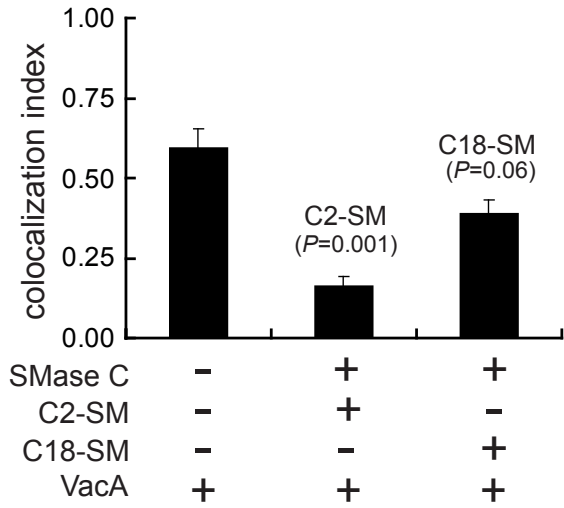

Supplement: NIHMS244425-supplement-Supp_Figure_S8.pdf [file NIHMS244425-supplement-Supp_Figure_S8.pdf]
